# Supplementary material for: Genetic variation of naturally growing olive trees in Israel: from abandoned groves to feral and wild?
Source: PubMed Central journal article supplement (PMC5154132; doi:10.1186/s12870-016-0947-5), 2016-12-13
Supplement: 12870_2016_947_MOESM1_ESM.pdf [file 12870_2016_947_MOESM1_ESM.pdf]

**Table S1.** SSR markers used, their expected size range, repeated motives and number of alleles found in naturally growing olive populations. Raw microsatellite data is available in Table S2 (enclosed as an Excel file).

| <b>SSR Marker</b> | <b>Expected range</b> | <b>Repeat motif</b>                                                                                              | <b>Reference</b>             | <b># Alleles</b> |
|-------------------|-----------------------|------------------------------------------------------------------------------------------------------------------|------------------------------|------------------|
| IAS-oli26         | 168-210               | (GA) <sub>14</sub>                                                                                               | Diaz et al. 2006             | 10               |
| UDO99-011         | 115                   | (CT) <sub>7</sub> (CA) <sub>10</sub> (CT) <sub>2</sub> (CA) <sub>2</sub> CT(CA) <sub>2</sub> CT(CA) <sub>9</sub> | Cipriani et al. 2002         | 8                |
| UDO99-024         | 188                   | (CA) <sub>11</sub> (TA) <sub>2</sub> (CA) <sub>4</sub>                                                           | Cipriani et al. 2002         | 12               |
| UDO99-025         | 158                   | (AC) <sub>16</sub> (AT) <sub>5</sub>                                                                             | Cipriani et al. 2002         | 16               |
| UDO99-043         | 174                   | (GT) <sub>12</sub>                                                                                               | Cipriani et al. 2002         | 32               |
| ssrOeUA-DCA1      | 230 (204–230)         | (GA) <sub>22</sub>                                                                                               | Sefc et al. 2000             | 8                |
| ssrOeUA-DCA3      | 250 (228–250)         | (GA) <sub>19</sub>                                                                                               | Sefc et al. 2000             | 30               |
| ssrOeUA-DCA9      | 191 (161–205)         | (GA) <sub>23</sub>                                                                                               | Sefc et al. 2000             | 24               |
| ssrOeUA-DCA11     | 179 (125–161)         | (GA) <sub>26</sub> (GGGA) <sub>4</sub>                                                                           | Sefc et al. 2000             | 23               |
| sssrOeUA-DCA16    | 178 (120–178)         | (GT) <sub>13</sub> (GA) <sub>29</sub>                                                                            | Sefc et al. 2000             | 29               |
| ssrOeUA-DCA18     | 178 (168–184)         | (CA) <sub>4</sub> CT(CA) <sub>3</sub> (GA) <sub>19</sub>                                                         | Sefc et al. 2000             | 13               |
| PA (ATT)2         | 115–136               | (TAA) <sub>6</sub>                                                                                               | Saumitou-Laprade et al. 2000 | 4                |
| EMO03             | 205-215               | (CA) <sub>7</sub>                                                                                                | De la Rosa et al. 2002       | 12               |
| EMO90             | 184 (180–197)         | (CA) <sub>10</sub>                                                                                               | De la Rosa et al. 2002       | 13               |
| GAPU59            | 227                   | (CT) <sub>9</sub>                                                                                                | Carriero et al. 2002         | 13               |
