# Supplementary material for: Genetic variation of naturally growing olive trees in Israel: from abandoned groves to feral and wild?
Source: PubMed Central journal article supplement (PMC5154132; doi:10.1186/s12870-016-0947-5), 2016-12-13

**Figure S2.**  $\Delta K$  values for the different  $K$ s were calculated according to Evanno et al. (2005), showing that  $K=3$  is the optimal  $K$  for the Structure analysis.

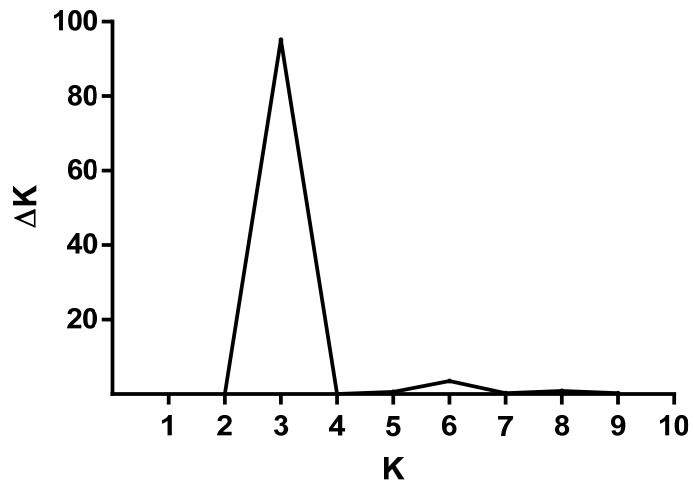

Supplement: 12870_2016_947_MOESM5_ESM.pdf [file 12870_2016_947_MOESM5_ESM.pdf]
